# Supplementary material
Source: PubMed Central journal article supplement (PMC5673564)
Supplement: NIHMS885931-supplement-Supp.pdf [file NIHMS885931-supplement-Supp.pdf]

## **Supplementary Information**

### **Materials and Methods**

We aspired to obtain a specific but complete body of research reports and several search methods were used to ensure a thorough examination of potential candidate reports.

**Multiple-database searches.** We used a set of paired keywords — misinformation OR misbelief\* OR false information OR belief perseverance OR continued influence, with another series of keywords — retract\* OR correct\* to search multiple online databases. The initial search yielded 76 reports.

**Other searches, personal contact, and electronic platforms.** By further culling the reference lists of the review papers obtained in the database searches, we identified an additional eight articles. By contacting scholars who conducted research in this area, we identified two other reports. Finally, we received relevant materials from one researcher as a result of posting requests to online forums and e-mail list servers (e.g., Society for Personality and Social Psychology).

We did not include studies measuring naturally occurring misbeliefs in a community (e.g., Carretta & Moreland, 1982; Kuklinski, Quirk, Jerit, Schwieder, & Rich, 2000; Lai, 2015; Lewandowsky, Stritzke, Oberauer, & Morales, 2005), because of the lack of an experimental manipulation. We also excluded studies that described the initial information as hypothetical (e.g., Anderson & Kellam, 1992) or uncertain (e.g., Koller, 1993). By February 15, 2015, this meta-analysis included eight research reports (see Figure 1).

### **Assessments of Bias**

We searched for the presence of a major type of bias that leads to the greater likelihood of samples yielding statistically significant findings being submitted and accepted for publication (for example, see Rothstein, Sutton, & Borenstein, 2005) and thus being included in our meta-analysis. Funnel plot is a visual aid of which assumes individual effect

sizes to be distributed around the expected mean in the shape of an inverted-funnel. In the absence of bias, studies with a larger  $N$ , which have greater precision and smaller standard errors, are likely to cluster around the expected mean near to the top of the figure, whereas studies with a smaller  $N$  (i.e., lesser precision and larger standard errors) should yield effect sizes far from the expected mean, near the middle/bottom of the figures (e.g., Sterne, Becker, & Egger, 2005). If the bias is present, the funnel plot should appear asymmetrical and may have gaps in the bottom right-hand or bottom left-hand side of the plot.

**Contour-enhanced funnel plots.** Funnel plots can be enhanced by adding contours of statistical significance and an expected fixed-effect centered at 0 to aid the interpretation (Peters, Sutton, Jones, Abrams, & Rushton, 2008). The effect sizes and standard errors are displayed in three contour-enhanced funnel plots in Figure 2. We also marked the observed fixed effects to aid the interpretation. Contemporary bias detection techniques such as trim-and-fill method (Borenstein et al., 2009; Duval, 2005), however, go beyond a visual inspection of plots. Additionally, the contour-enhanced funnel plots with the trim and fill procedures are designed to distinguish different forms of bias and estimate the statistical significance of the missing studies. The contours delineate three regions: (a) the white-colored region corresponds to  $p > .10$ ; (b) the gray-colored region corresponds to  $.05 < p < .10$ ; (c) the dark gray-colored region corresponds to  $.01 < p < .05$ ; and (d) the region outside of the funnel corresponds to corresponds to  $p < .01$  (Peters et al., 2010). As shown in the bottom panel of Figure 2, all filled samples corresponding to the misinformation-persistence effect appear in region of  $p < .01$ , suggesting publication bias is a plausible explanation. However, there are several other possible explanations for funnel-plot asymmetry (see Lau, Ioannidis, Terrin, Schmid, & Olkin, 2006; Sterne & Harbord, 2004 for review). We assessed the presence of bias using selection models (Bishop & Thompson, 2016; Coburn & Vevea, 2015; McShane, Böckenholt, & Hansen, 2016).

**Selection models.** We used Vevea and Hedges (1995) weight-function models to explore the range of estimates that possibly result from various forms of and severity of publication bias. The results revealed stable estimates regardless of the selection models assumed for the effects of misinformation,  $M_{\text{diff}} = 0.14 - 0.38$ , and misinformation-persistence,  $M_{\text{diff}} = 0.24 - 0.30$ . However, the debunking estimates varied considerably based on the selection models,  $M_{\text{diff}} = 2.21$ , which suggests that publication bias may drive the unadjusted estimate. Next, we assessed the presence of bias with publication status as a moderator.

**Publication status (or online vs. lab data collection).** We examined whether the effects sizes varied with the publication status. For misinformation, no significant result of publication status was present, MEM:  $b = -2.20$ ,  $SE = 1.11$ ,  $p = .0476$ , whereas, a significant moderating role of publication status was observed in the debunking and misinformation persistence effects: Published studies reported a significantly weaker debunking effect, MEM:  $b = -2.56$ ,  $SE = 0.59$ ,  $p < .0001$ , and a stronger persistence effect than did unpublished ones, i.e., dissertations vs. other sources, MEM:  $b = 1.05$ ,  $SE = 0.32$ ,  $p = .0012$ . A similar pattern of results was yielded in the analyses with the removal of outliers. However, publication status overlaps with online vs. lab data collection. The difference between published and unpublished impacts can also be attributable to differences in data collection settings (lab vs. online).

**P-curve and p-uniform.** These approaches assume that the distribution of  $p$  values conditional on the population effect size is uniform. All half and full  $p$ -curve tests were right-skewed with  $p < .1$ , which indicates the presence of *evidential value*, i.e., the lack of evidence of publication bias (Simonsohn, Simmons, & Nelson, 2015). Additionally,  $p$ -uniform is a method to assess publication bias, which assumed the population effect size to be fixed rather than heterogeneous (van Aert, Wicherts, & van Assen, 2016). The results, regardless of the

outliers, showed no evidence of  $p$ -hacking for the effects of misinformation, debunking, or misinformation-persistence ( $ps \geq .05$ ).

## References

- Anderson, C. A., & Kellam, K. L. (1992). Belief perseverance, biased assimilation, and covariation detection: The effects of hypothetical social theories and new data. *Personality and Social Psychology Bulletin*, *18*(5), 555–565. <http://doi.org/10.1177/0146167292185005>
- Bishop, D. V. M., & Thompson, P. A. (2016). Problems in using p-curve analysis and text-mining to detect rate of p-hacking and evidential value. *PeerJ*, *4*, e1715. <http://doi.org/10.7717/peerj.1715>
- Borenstein, M., Hedges, L., Higgins, J., & Rothstein, H. (2009). *Introduction to meta-analysis*. New York, NY: Wiley.
- Carretta, T. R., & Moreland, R. L. (1982). Nixon and Watergate: A field demonstration of belief perseverance. *Personality and Social Psychology Bulletin*, *8*(3), 446–453. <http://doi.org/10.1177/0146167282083010>
- Coburn, K. M., & Vevea, J. L. (2015). Publication bias as a function of study characteristics. *Psychological Methods*, *20*(3), 310–330. <http://doi.org/10.1037/met0000046>
- Cohen, J. (1988). *Statistical power analysis for the behavioral sciences* (2nd ed.). Hillsdale, NJ: Erlbaum.
- Duval, S. (2005). The “trim and fill” method. In H. R. Rothstein, A. J. Sutton, & M. Borenstein (Eds.), *Publication bias in meta-analysis: Prevention, assessment, and adjustments* (pp. 127–144). West Sussex: John Wiley & Sons.
- Ecker, U. K. H., Lewandowsky, S., Fenton, O., & Martin, K. (2014). Do people keep believing because they want to? Preexisting attitudes and the continued influence of misinformation. *MEMORY & COGNITION*, *42*(2), 292–304. <http://doi.org/10.3758/s13421-013-0358-x>
- Ecker, U. K. H., Lewandowsky, S., Swire, B., & Chang, D. (2011). Correcting false information in memory: Manipulating the strength of misinformation encoding and its retraction. *Psychonomic Bulletin & Review*, *18*(3), 570–578. <http://doi.org/http://dx.doi.org/10.3758/s13423-011-0065-1>
- Hedges, L. V., & Olkin, I. (1985). *Statistical methods for meta-analysis*. Orlando, FL: Academic.
- Higgins, J. P. T., & Thompson, S. G. (2002). Quantifying heterogeneity in a meta-analysis. *Statistics in Medicine*, *21*(11), 1539–58. <http://doi.org/10.1002/sim.1186>
- Higgins, J. P. T., Thompson, S. G., Deeks, J. J., & Altman, D. G. (2003). Measuring inconsistency in meta-analyses. *BMJ: British Medical Journal*, *327*(7414), 557–560. <http://doi.org/10.1136/bmj.327.7414.557>
- Johnson, H. M., & Seifert, C. M. (1994). Sources of the continued influence effect: When misinformation in memory affects later inferences. *Journal of Experimental Psychology: Learning, Memory, and Cognition*, *20*(6), 1420–1436. <http://doi.org/10.1037/0278-7393.20.6.1420>

- Koller, M. (1993). Rebutting accusations: When does it work, when does it fail? *European Journal of Social Psychology*, 23(4), 373–389. <http://doi.org/10.1002/ejsp.2420230405>
- Kuklinski, J. H., Quirk, P. J., Jerit, J., Schwieder, D., & Rich, R. F. (2000). Misinformation and the currency of democratic citizenship. *Journal of Politics*, 62(3), 790–816. <http://doi.org/10.1111/0022-3816.00033>
- Lai, C. K. (2015). *Truth or truthiness? How desires influence truth associations*. University of Virginia.
- Lau, J., Ioannidis, J. P. A., Terrin, N., Schmid, C. H., & Olkin, I. (2006). Evidence based medicine: The case of the misleading funnel plot. *BMJ: British Medical Journal*, 333(7568), 597–600. Retrieved from <http://www.jstor.org.proxy2.library.illinois.edu/stable/40700161>
- Lewandowsky, S., Stritzke, W. G. K., Oberauer, K., & Morales, M. (2005). Memory for fact, fiction, and misinformation: The Iraq War 2003. *Psychological Science*, 16(3), 190–195. <http://doi.org/http://dx.doi.org/10.1111/j.0956-7976.2005.00802.x>
- McShane, B. B., Böckenholt, U., & Hansen, K. T. (2016). Adjusting for publication bias in meta-analysis: An evaluation of selection methods and some cautionary notes. *Perspectives on Psychological Science: A Journal of the Association for Psychological Science*, 11(5), 730–749. <http://doi.org/10.1177/1745691616662243>
- Peters, J. L., Sutton, A. J., Jones, D. R., Abrams, K. R., & Rushton, L. (2008). Contour-enhanced meta-analysis funnel plots help distinguish publication bias from other causes of asymmetry. *Journal of Clinical Epidemiology*, 61(10), 991–996. <http://doi.org/10.1016/j.jclinepi.2007.11.010>
- Peters, J. L., Sutton, A. J., Jones, D. R., Abrams, K. R., Rushton, L., & Moreno, S. G. (2010). Assessing publication bias in meta-analyses in the presence of between-study heterogeneity. *Journal of the Royal Statistical Society: Series A (Statistics in Society)*, 173(3), 575–591. <http://doi.org/10.1111/j.1467-985X.2009.00629.x>
- Rothstein, H. R., Sutton, A. J., & Borenstein, M. (2005). Publication bias in meta-analysis. In H. R. Rothstein, A. J. Sutton, & M. Borenstein (Eds.), *Publication bias in meta-analysis: Prevention, assessment, and adjustments* (pp. 1–8). West Sussex: John Wiley & Sons.
- Simonsohn, U., Nelson, L. D., & Simmons, J. P. (2014). P-curve: A key to the file-drawer. *Journal of Experimental Psychology: General*, 143(2), 534–47. Retrieved from <http://www.ncbi.nlm.nih.gov/pubmed/23855496>
- Simonsohn, U., Simmons, J. P., & Nelson, L. D. (2015). Better p-curves: Making p-curve analysis more robust to errors, fraud, and ambitious p-hacking, a reply to Ulrich and Miller (2015). *Journal of Experimental Psychology: General*, 144(6), 1146–1152. <http://doi.org/10.1037/xge0000104>
- Sterne, J. A. C., Becker, B. J., & Egger, M. (2005). The funnel plot. In H. R. Rothstein, A. J. Sutton, & M. Borenstein (Eds.), *Publication Bias in Meta-Analysis: Prevention, Assessment and Adjustments* (pp. 75–98). West Sussex: John Wiley & Sons.
- Sterne, J. A. C., & Harbord, R. M. (2004). Funnel plots in meta-analysis. *The Stata Journal*,

4(2), 127–141. Retrieved from <http://www.stata-journal.com/article.html?article=st0061>

- Thorson, E. A. (2013). *Belief echoes: The persistent effects of corrected misinformation*. *Dissertations available from ProQuest*. Retrieved from <http://repository.upenn.edu/dissertations/AAI3564225>
- van Aert, R. C. M., Wicherts, J. M., & van Assen, M. A. L. M. (2016). Conducting meta-analyses based on p-values: Reservations and recommendations for applying p-uniform and p-curve. *Perspectives on Psychological Science*, *11*(5), 713–729. <http://doi.org/10.1177/1745691616650874>
- van Assen, M. A. L. M., van Aert, R. C. M., & Wicherts, J. M. (2015). Meta-analysis using effect size distributions of only statistically significant studies. *Psychological Methods*, *20*(3), 293–309. <http://doi.org/10.1037/met0000025>
- Vevea, J. L., & Hedges, L. V. (1995). A general linear model for estimating effect size in the presence of publication bias. *Psychometrika*, *60*(3), 419–435. <http://doi.org/10.1007/BF02294384>
- Wilkes, A. L., & Leatherbarrow, M. (1988). Editing episodic memory following the identification of error. *The Quarterly Journal of Experimental Psychology Section A*, *40*(2), 361–387. <http://doi.org/10.1080/02724988843000168>
